# Supplementary material for: Differential Expression of Ago2-Mediated MicroRNA Signaling in Adipose Tissue is Associated with Food Induced Obesity
Source: Research Square preprint supplement (doi:10.21203/rs.3.rs-1355723/v1), 2022-02-16
Supplement: Supplementary file 1 [file 0937eda75a3990f2c012e98a.docx]

**Table S1** **The primer sequence of mRNAs for qPCR**

| **Genes** | **GenBankTM accession no.** | **Sequence (5′-3′)** |
| --- | --- | --- |
| *β-actin* | NM_007393 | Forward: GTCCTCTCCCAAGTCCACAC  Reverse: GGGAGACCAAAAGCCTTCAT |
| *Ago2* | NM_153178 | Forward: GCACTTACCATCCATGAGGTAC  Reverse: AAAGAGAAGGTCGGACGGACTGAT |
| *AMPKα1* | NM_001355640 | Forward: GGGATCCATCAGCAACTATCG  Reverse: GGGAGGTCACGGATCAGG |
| *Ucp1* | NM_009463 | Forward: AGGCTTCCAGTACCATTAGGT  Reverse: CTGAGTGAGGCAAAGCTGATTT |
| *Cidea* | NM_007702 | Forward: TGCTCTTCTGTATCGCCCAGT  Reverse: GCCGTGTTAAGGAATCTGCTG |
| *Cox8b* | NM_007751 | Forward: GAACCATGAAGCCAACGACT  Reverse: GCGAAGTTCACAGTGGTTCC |
| *Elovl3* | NM_007703 | Forward: CGTAGTCAGATTCTGGTCCT  Reverse: CCAGAAGAAGTGTTCCGTTG |
| *Ucp2* | NM_011671 | Forward: CTGCAGATCCAAGGGGAGAGT  Reverse: CCTTGGTGTAGAACTGTTTGACAG |
| *Cpt1* | NM_001039657 | Forward: CTCTCGACGAGCCAAACCC  Reverse: CCGCAATGATATACGAAACGC |
| *Cd36* | NM_001159558 | Forward: GAACCACTGCTTTCAAAAACTGG  Reverse: TGCTGTTCTTTGCCACGTCA |
| *Ldlr* | NM_010700 | Forward: TGACTCAGACGAACAAGGCTG  Reverse: CTAACTAAACACCAGACAGAGGC |
| *Fas* | NM_004104 | Forward: GGTTACACTGTGCTAGGTGTTG  Reverse: TCCAGGCGCATGAGGCTCAGC |
| *ACC1* | NM_133360 | Forward: AAGGGCTGCCTCTAATG  Reverse: GATGTAAGCGCCGAACT |
| *ACC2* | NM_133904 | Forward: GCCAGAAGCCCCCAAGAAAC  Reverse: CGACATGCTCGGCCTCATAG |
| *GPAT* | NM_001079096 | Forward: GACGTCCGTAAGAGCATGTTTTG  Reverse: CTTCACTTTGTTGGTGGATTTGG |
| *Srebp1* | NM_0011480 | Forward: TGAAGCCGGAGGTGGTAGA  Reverse: CTTCATCTGGCTGTCCTCAAAA |
| *ChREBP* | NM_001359237 | Forward: GTATGTGGAGCGGAGGAAGAG  Reverse: ATGACGGCCTCGGGTTT |
| *S14* | NM_009381 | Forward: TGAGAACGACGCTGCTGAAAC  Reverse: AGGTGGGTAAGGATGTGATGGAG |
| *HMGCR* | NM_008255 | Forward: CTCAGTTCAAATTCACAGGATGAAGTAAG  Reverse: ACGGCTTTCACGAGAAAGCTCTAG |
